# Supplementary material for: How German vascular surgeons and angiologists judge walking exercise for patients with PAD
Source: Atypon-hosted journal article supplement (doi:10.1024/0301-1526/a001071), 2023-04-28
Supplement: 0301-1526_a001071_esm1.pdf [file 0301-1526_a001071_esm1.pdf]

## Electronic supplementary material

### ESM 1. Original survey (German language)

1. Welcher **Fachdisziplin** gehören Sie an (inkl. angestrebte Weiterbildung)

- Gefäßchirurgie
- Angiologie
- Radiologie
- Andere

#### Question Title

\* 2. In welcher **Anstellung** führen Sie die Behandlung von Patient:innen mit peripherer arterieller Verschlusskrankheit (PAVK) durch?

- Arzt oder Ärztin in Weiterbildung
- Facharzt oder Fachärztin (inkl. Schwerpunktweiterbildung)
- Facharzt oder Fachärztin in leitender klinischer Funktion (Oberärzt:in, Chefärzt:in oder ähnlich)
- Arzt oder Ärztin in Niederlassung
- Sonstige

#### Question Title

3. Bitte wählen Sie: Welche **Tätigkeiten** führen Sie regelmäßig bei der Behandlung von Patient:innen mit PAVK durch? (Mehrfachauswahl)

- Beratung und Aufklärung zur Erkrankung und Prävention
- Stufendiagnostik
- Wundtherapie
- Endovaskuläre Revaskularisationen (z.B. PTA)
- Offen-chirurgische Revaskularisationen (z.B. Bypass)
- Rehabilitation

#### Question Title

\* 4. Wie würden Sie Ihre **Institution** am zutreffendsten beschreiben?

- Universitätsklinik
- Akademisches Lehrkrankenhaus (nicht-universitär)
- Nicht-universitäre Klinik, kein akademisches Lehrkrankenhaus
- Einrichtung der ambulanten Versorgung
- Rehabilitationseinrichtung
- Sonstige

## Electronic supplementary material

### Question Title

\* 5. Bitte geben Sie ihre **Altersgruppe** an

- Unter 30 Jahre
- 30 bis 44 Jahre
- 45 bis 59 Jahre
- 60 +

### Question Title

6. Bitte nennen Sie Ihre **Geschlechteridentität**

- Weiblich
- Männlich
- Divers

### Question Title

7. Bitte schätzen Sie: Wie viele (%) der von Ihnen behandelten Patient:innen mit Claudicatio intermittens nehmen an einem **strukturierten Gehtraining in einer Gefäßsportgruppe** teil?

0 %

### Question Title

8. Bitte schätzen Sie: Wie viel Zeit (Minuten) wenden Sie im Durchschnitt pro Kopf auf, um Ihre Patient:innen mit PAVK über **Gesundheitsprävention und Optimierung von kardiovaskulären Risikofaktoren aufzuklären?**

0 Minuten

### Question Title

9. Ist Ihnen selbst eine **lokale Gefäßsportgruppe** mit Ansprechkontakt für Ihre Patient:innen bekannt?

- Ja
- Nein

### Question Title

10. Bitte wählen Sie (falls zutreffend): Ich würde meinen Patienten gern eine Gefäßsportgruppe empfehlen und ... (Mehrfachauswahl)

- ...überweise meine Patienten bereits in eine gefäßmedizinische Rehabilitation
- ...kenne keine Rehabilitationsklinik, die ein gefäßmedizinisches Angebot hat
- ...finde prinzipiell **das Angebot einer gefäßmedizinischen** Rehabilitation sehr gut
- ...würde die Zuweisung in die **gefäßmedizinische Rehabilitation aktiv nutzen**, wenn sich Rehabilitationskliniken in meiner Region spezialisieren

## Electronic supplementary material

### Question Title

11. Bitte bewerten Sie die folgenden Aussagen (Zustimmung)

Ich **empfehle** allen Patient:innen mit Claudicatio intermittens die Teilnahme an einem strukturierten Gehtraining

Ich kann den Patient:innen mit PAVK **hilfreiche Informationen** geben, um eine lokale Gefäßsportgruppe zu finden

Ich weiß, wie das Gehtraining als **Rehabilitationssport** (Kassenleistung) verordnet wird

Ich habe im Arbeitsalltag **ausreichend Zeit**, um meine Patient:innen mit PAVK über Prävention und Risikofaktoren aufzuklären

Durch die konsequente Durchführung eines strukturierten Gehtrainings kann die **schmerzfrie Gehstrecke** verbessert werden

Auf dem Boden der Studienlage ist das strukturierte Gehtraining im Stadium der Claudicatio intermittens **gleichwertig** gegenüber invasiven Verfahren

Ich erhebe die **krankheitsbezogene Lebensqualität** meiner Patient:innen mit einem strukturierten Fragebogen (z.B. VascuQoL6, WIQ, SF12 oder andere)

1 Stimme ganz und gar nicht zu

2 Stimme nicht zu

3 Stimme zu

4 Stimme voll und ganz zu

### Question Title

12. Wen halten Sie für **hauptverantwortlich** für die Gründung und den Betrieb einer Gefäßsportgruppe?

Krankenhausärzt:innen | Sporttherapeut:innen | Fachgesellschaften | Gefäßliga/Verbände | Niedergelassene Kolleg:innen | Rehabilitationskliniken | Kostenträger/Krankenkassen
